# Supplementary material
Source: Springer Nature journal article supplement (https://mijn.bsl.nl/resource/supplementary/13047_2009_116_MOESM7_ESM.pdf/7110100)

# SAGITTAL

# FRONTAL

# TRANSVERSE

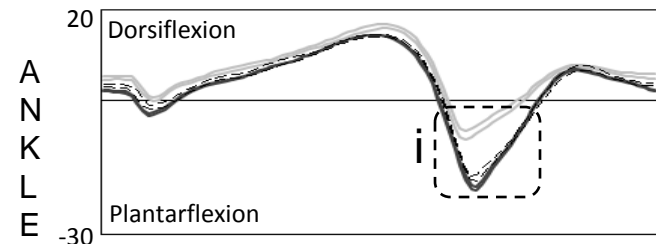

Ankle motion not derived for this plane

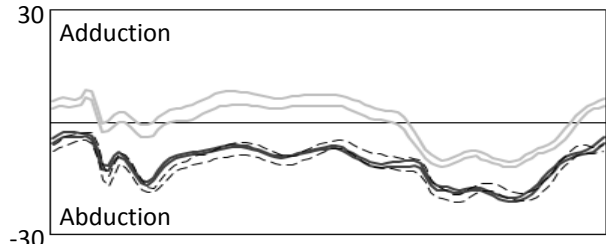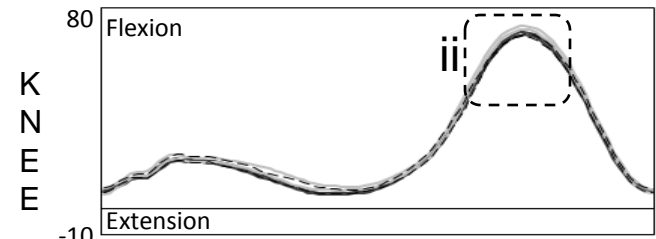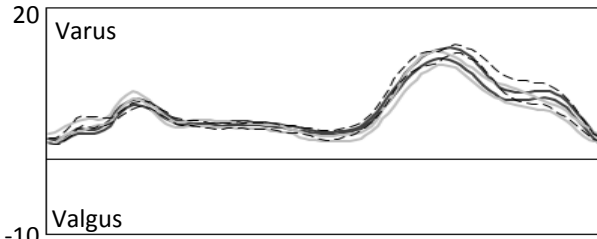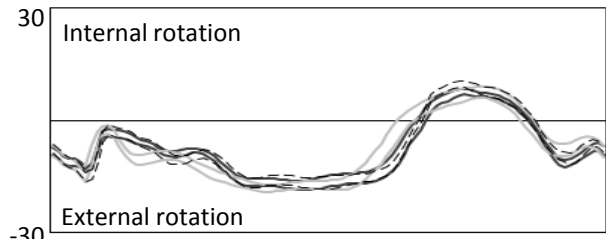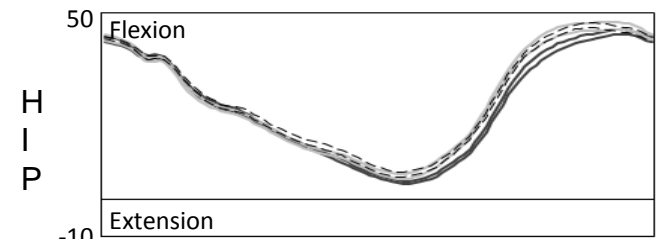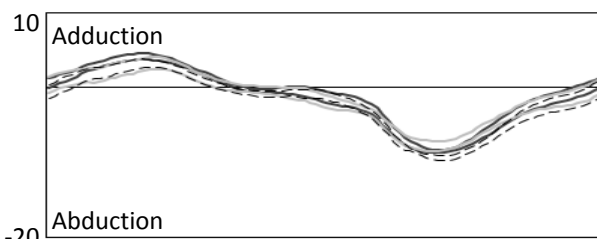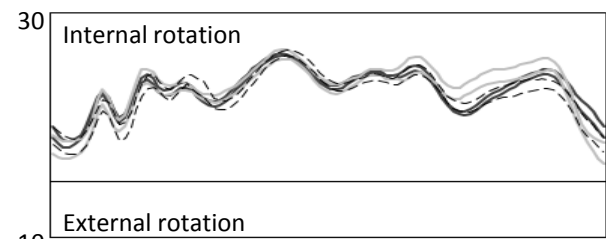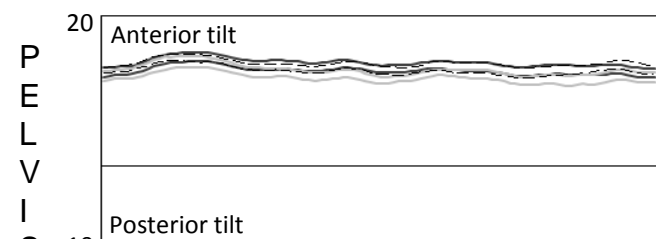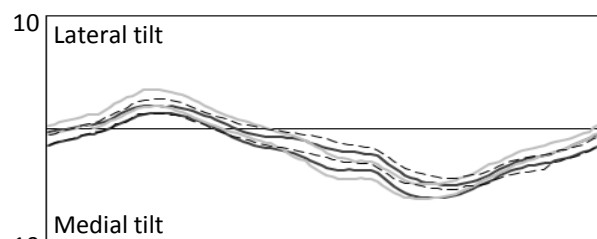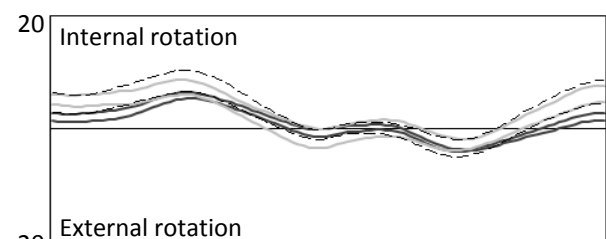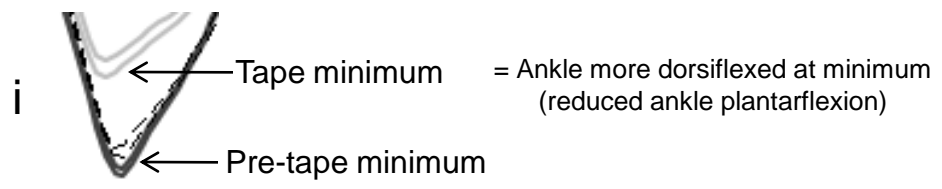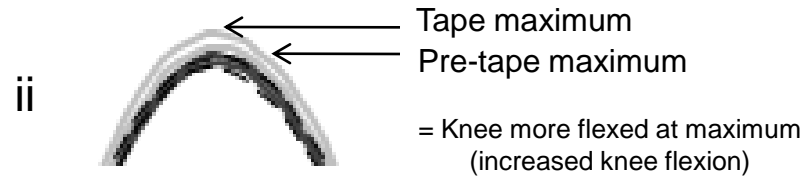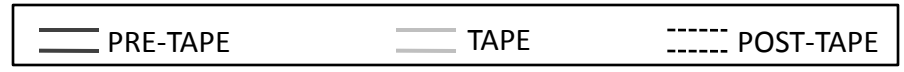

Supplement: MOESM7 [file 7110100]
